# Supplementary material for: Using the Nordic Geodetic Observing System for land uplift studies
Source: Copernicus journal article supplement (doi:10.5194/se-5-673-2014), 2014-07-17
Supplement: Supplementary file 1 [file se-5-673-2014-supplement.pdf]

Supplement of Solid Earth, 5, 673–681, 2014  
<http://www.solid-earth.net/5/673/2014/>  
doi:10.5194/se-5-673-2014-supplement  
© Author(s) 2014. CC Attribution 3.0 License.

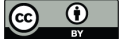

*Supplement of*

## **Using the Nordic Geodetic Observing System for land uplift studies**

**M. Nordman et al.**

*Correspondence to:* M. Nordman (maaria.nordman@fgi.fi)

## **Link to the data**

The link is mentioned in the text, Chapter 2, first paragraph:

The existing station list of NGOS (Poutanen et al., 2005) was taken as the starting point. The link to database is on the NKG web pages (<http://www.nkg.fi> → NKG Data Banks). The station list database is also available as a clickable map interface behind this link and for each station a page with station information and links to relevant databases was created.
